# Supplementary material for: Direct evidence for a pressure-induced nodal superconducting gap in the Ba0.65Rb0.35Fe2As2 superconductor
Source: PubMed Central journal article supplement (PMC4667685; doi:10.1038/ncomms9863), 2015-11-09
Supplement: ncomms9863-s1.pdf [file ncomms9863-s1.pdf]

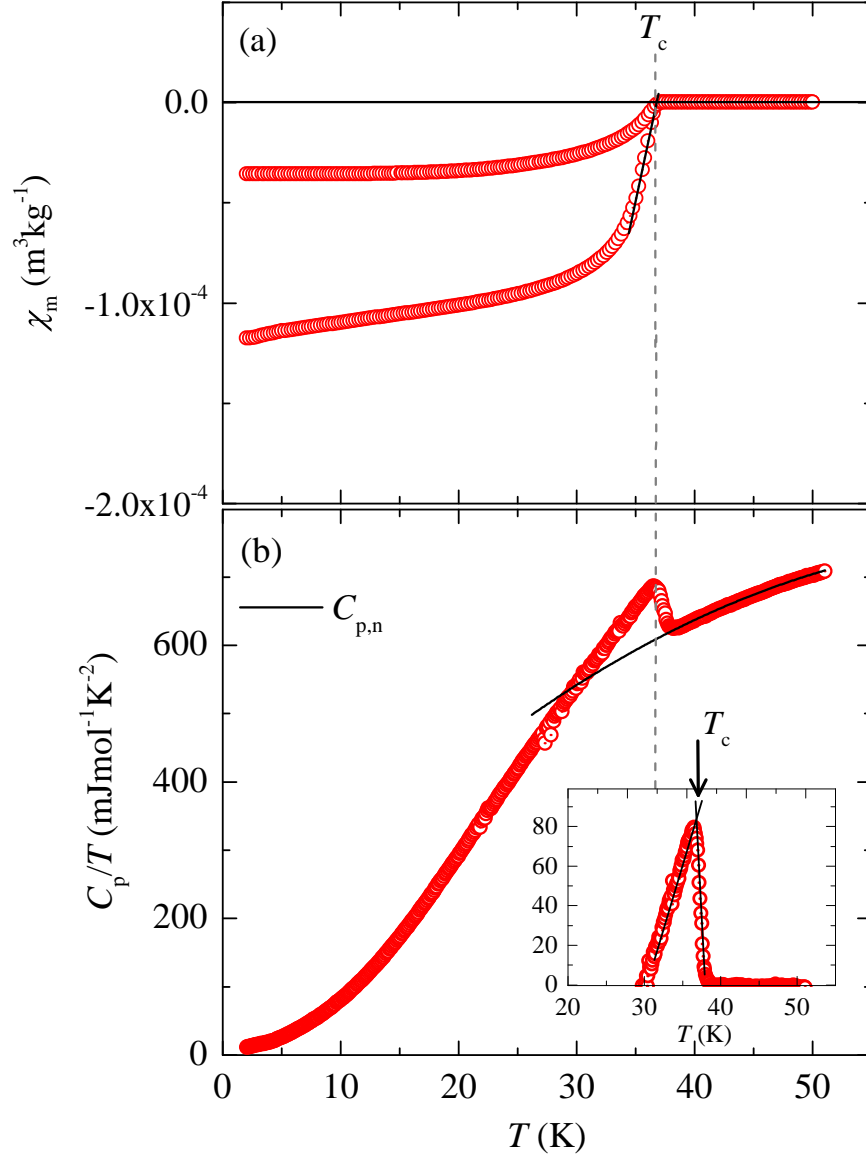

Supplementary Figure 1: **Magnetic susceptibility and specific heat.** (a) Temperature dependence of the zero-field cooled (ZFC) and field-cooled (FC) susceptibility  $\chi_m$  obtained in an applied magnetic field of  $\mu_0 H = 10$  mT for optimally doped  $\text{Ba}_{0.65}\text{Rb}_{0.35}\text{Fe}_2\text{As}_2$ . (b) Specific heat  $C_p/T$  as a function of temperature of  $\text{Ba}_{0.65}\text{Rb}_{0.35}\text{Fe}_2\text{As}_2$ . Inset shows the temperature dependence of the quantity  $\Delta C_p/T$  with  $\Delta C_p = (C_p - C_{p,n})$ , where  $C_{p,n}$  represent the phonon dominated background. The arrow denotes the superconducting transition temperature  $T_c$ . Error bars indicate the statistical uncertainty of the data.

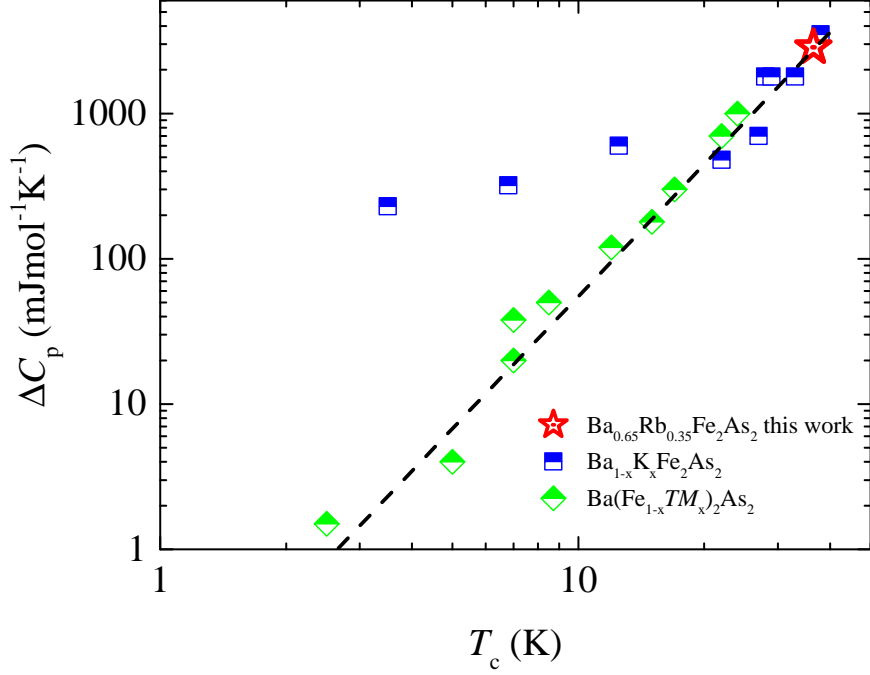

Supplementary Figure 2: **Specific heat scaling.** (a) Specific heat jump  $\Delta C_p$  at the superconducting transition vs  $T_c$  for  $\text{Ba}_{0.65}\text{Rb}_{0.35}\text{Fe}_2\text{As}_2$ , plotted together with literature data for various FeAs-based superconductors. The line corresponds to  $\Delta C_p \propto T^3$  (after [1]).

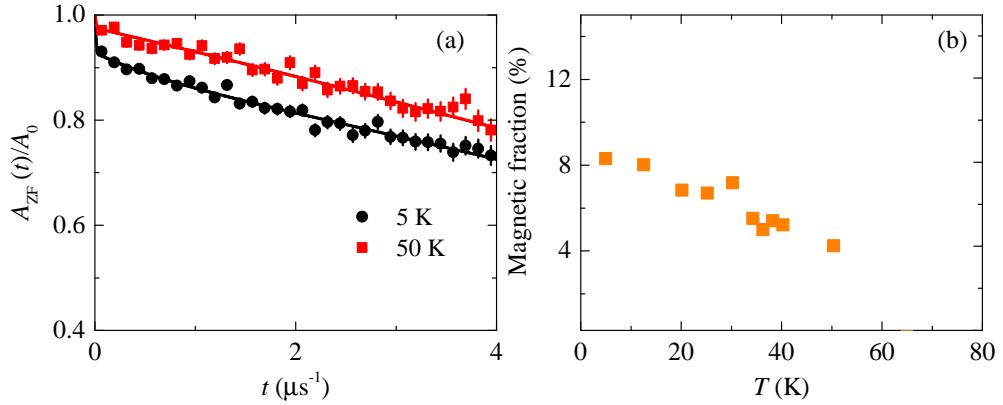

Supplementary Figure 3: **Magnetic signal at ambient pressure.** (a) The ZF- $\mu$ SR time spectra for  $\text{Ba}_{0.65}\text{Rb}_{0.35}\text{Fe}_2\text{As}_2$  recorded above and below  $T_c$ . Error bars indicate the statistical uncertainty of the data. The solid line represent the fits to the data by means of Supplementary Equation 1. (b) Temperature dependence of the magnetic fraction of  $\text{Ba}_{0.65}\text{Rb}_{0.35}\text{Fe}_2\text{As}_2$ , extracted from the ZF- $\mu$ SR experiments. Error bars give the fit errors.

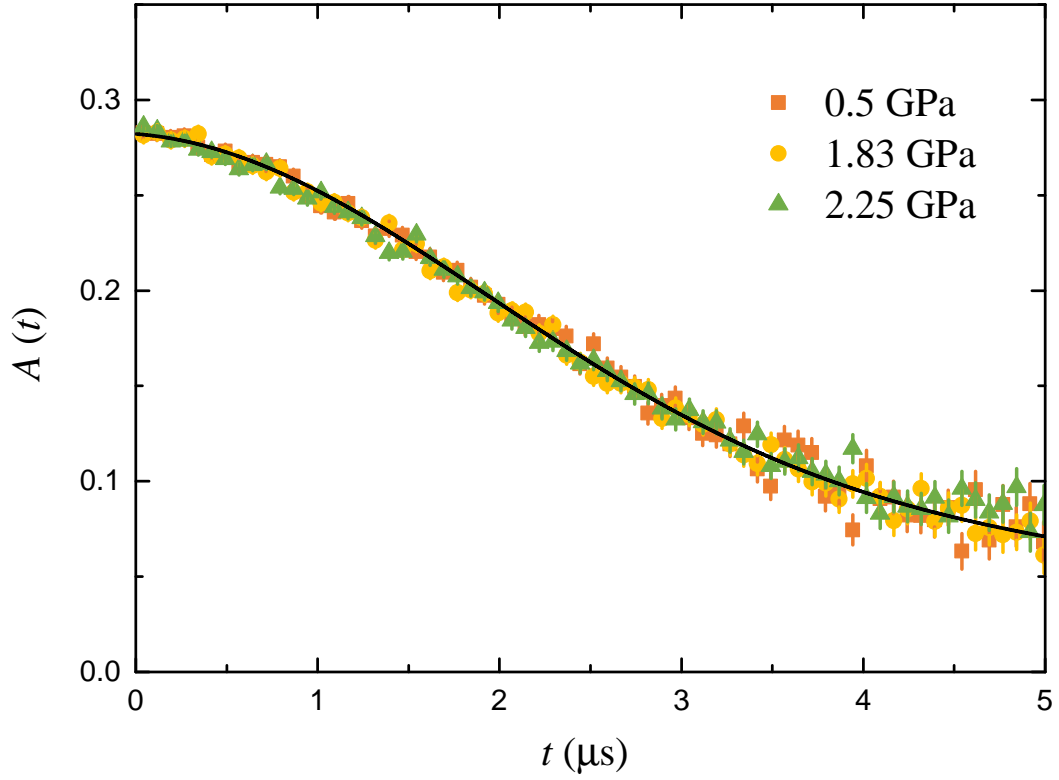

Supplementary Figure 4: **Pressure independent magnetic signal.** ZF- $\mu$ SR time spectra for  $\text{Ba}_{0.65}\text{Rb}_{0.35}\text{Fe}_2\text{As}_2$  at various applied pressures recorded at the base temperature  $T = 1.4$  K. Error bars indicate the statistical errors of the data. The solid line represents the fit to the data by means of the sum of the Eq. (1) and a damped Kubo-Toyabe depolarization function to account for the pressure cell signal.

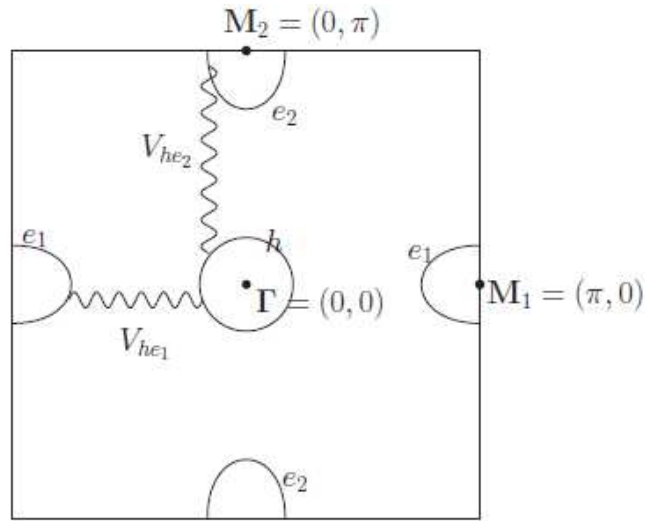

Supplementary Figure 5: **Three pocket model used in our calculations.** It is assumed that the system has one hole pocket  $h$  centered around  $\Gamma = (0, 0)$  and two electron pockets  $e_1$  and  $e_2$  centered around  $M_1 = (\pi, 0)$  and  $M_2 = (0, \pi)$ .

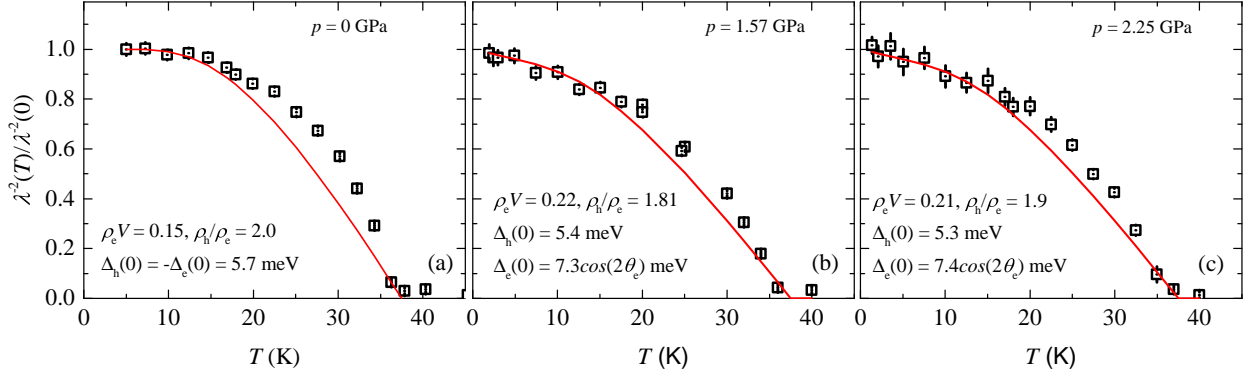

Supplementary Figure 6: **Analysis of the temperature dependence of the penetration depth using microscopic model.** The temperature dependence of  $\lambda^{-2}(T)/\lambda^{-2}(0)$  measured at various applied hydrostatic pressures of  $\text{Ba}_{0.65}\text{Rb}_{0.35}\text{Fe}_2\text{As}_2$ . The square symbols are experimental data and the red curves are the theoretical functions. Error bars give the fit errors. (a) Fitting for the  $P = 0$  data, which suggests a nodeless state. (b) and (c) Fitting for  $P = 1.57$  GPa and  $P = 2.25$  GPa. The fitting suggests that nodes exist on the two electron pockets at the angles  $\theta_e = \pm\pi/4$  and  $\pm 3\pi/4$ .

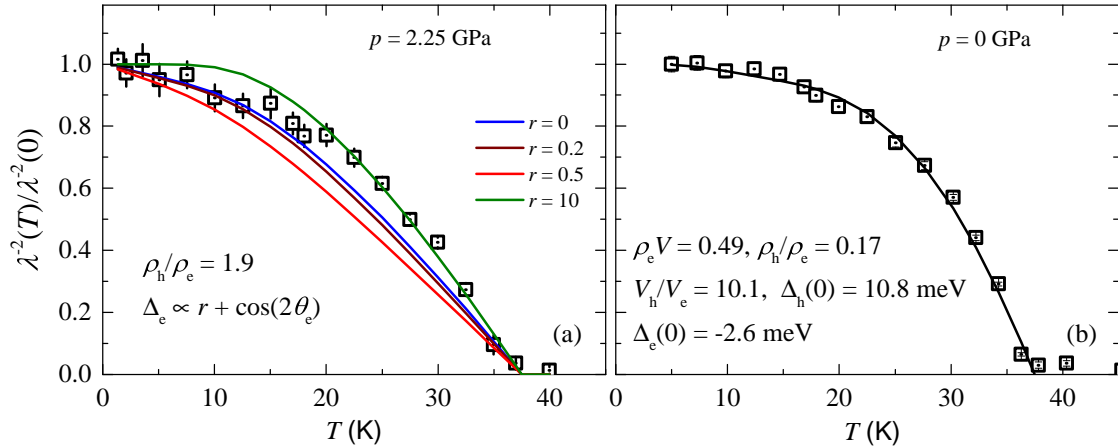

Supplementary Figure 7: **Effect of the electron pocket gap anisotropy on the penetration depth at  $p = 2.25$  GPa.** (a) The electron gap is nodal if  $r < 1$ , and becomes nodeless if  $r > 1$ . The low temperature data clearly shows that the gap is nodal, but the data near  $T_c$  seems to be better described by a nodeless state. (b) Fitting for the zero pressure case with the Fermi velocity ratio  $v_h/v_e$  being a free parameter. The fitting improves with respect to Fig. 6a, but the values of  $v_h/v_e$  and  $\rho_h/\rho_e$  seem to be too large or too small.

## I. SUPPLEMENTARY NOTE 1: SAMPLE CHARACTERIZATION

The temperature dependence of the zero field-cooled (ZFC) and field-cooled (FC) diamagnetic susceptibility of  $\text{Ba}_{0.65}\text{Rb}_{0.35}\text{Fe}_2\text{As}_2$  measured in a magnetic field of  $\mu_0 H = 1$  mT is shown in Supplementary Figure 1a. From the diamagnetic response the SC transition temperature  $T_c$  is determined from the intercept of the linearly extrapolated zero-field cooled (ZFC) susceptibility curve with  $\chi_m = 0$  line, and it is found to be  $T_c = 36.8(5)$  K. The temperature-dependent heat capacity data for this sample plotted as  $C_p/T$  vs  $T$  is shown in Supplementary Figure 1b. The jump associated with the SC transitions is clearly seen. Here the anomaly at the transition has been isolated from the phonon dominated background by subtracting a second order polynomial  $C_{p,n}$  fitted above  $T_c$  and extrapolated to lower temperature. The quantity  $\Delta C_p/T$  with  $\Delta C_p = (C_p - C_{p,n})$  is presented as a function of temperature in the inset of Supplementary Figure 1b. Although there may be some uncertainty in using this procedure over an extended temperature range, the lack of appreciable thermal SC fluctuations, as evidenced by the mean-field-like form of the anomaly, means that there is very little uncertainty in the size of  $\Delta C_p$ . Bud'ko et. al. [1] found that in many 122 Fe-based superconductors the specific heat jump  $\Delta C_p$  at  $T_c$  follows the empirical trend, the so-called BNC scaling  $\Delta C_p \propto T^3$ . This has been interpreted as either originating from quantum critically or from strong impurity pair breaking. A violation of the BNC scaling was observed for  $\text{Ba}_{1-x}\text{K}_x\text{Fe}_2\text{As}_2$  for  $x > 0.7$  [1] and in addition a change of the SC gap symmetry was observed. The specific heat jump data for  $\text{Ba}_{0.65}\text{Rb}_{0.35}\text{Fe}_2\text{As}_2$  obtained in this work is added in Supplementary Figure 2 to the BNC plot taken from Ref. [1]. Our data point lies perfectly on the BNC line.

## II. SUPPLEMENTARY NOTE 2: RESULTS OF THE ZERO-FIELD $\mu\text{SR}$ EXPERIMENTS

It is well known that undoped  $\text{BaFe}_2\text{As}_2$  is not superconducting at ambient pressure and undergoes a spin-density wave (SDW) transition of the Fe-moments far above  $T_c$  [2]. The SC state can be achieved either under pressure [3, 4] or by appropriate charge carrier doping of the parent compound [5], leading to a suppression of the SDW state. Magnetism, if present in the samples, must be taken into account in the TF- $\mu\text{SR}$  data analysis. Therefore,

we have carried out ZF- $\mu$ SR experiments above and below  $T_c$  to search for magnetism in  $\text{Ba}_{0.65}\text{Rb}_{0.35}\text{Fe}_2\text{As}_2$ . As an example, ZF- $\mu$ SR spectra recorded at  $T = 5$  K and 50 K of  $\text{Ba}_{0.65}\text{Rb}_{0.35}\text{Fe}_2\text{As}_2$  are shown in Supplementary Figure 3a. There is no precession signal, indicating that there is no long-range magnetic order. On the other hand, we observed a significant drop of the asymmetry, taking place within  $0.2 \mu\text{s}$ . This is caused by the presence of diluted Fe moments as discussed in previous  $\mu$ SR studies [6]. In order to quantify the magnetic fraction, the ZF- $\mu$ SR data were analyzed by the following function:

$$A_{\text{ZF}}(t) = \Omega A_0 \left[ \frac{2}{3} e^{-\lambda_T t} + \frac{1}{3} e^{-\lambda_L t} \right] + (1 - \Omega) A_0 \left[ \frac{1}{3} + \frac{2}{3} (1 - \sigma^2 t^2 - \Lambda t) e^{(-\frac{\sigma^2 t^2}{2} - \Lambda t)} \right]. \quad (1)$$

the first and the second terms describe the magnetic and nonmagnetic part of the signals, respectively.  $A_0$  is the initial asymmetry,  $\Omega$  is the magnetic volume fraction, and  $\lambda_T$  ( $\lambda_L$ ) is the transverse (longitudinal) depolarization rate of the  $\mu$ SR signal, arising from the magnetic part of the sample. The second term describing the paramagnetic part of the sample is the combination of a Lorentzian and a Gaussian Kubo-Toyabe depolarization functions [7, 8].  $\sigma$  and  $\Lambda$  are the depolarization rates due to the nuclear dipole moments and randomly oriented diluted local electronic moments, respectively. The temperature dependence of the magnetic fraction obtained for  $\text{Ba}_{0.65}\text{Rb}_{0.35}\text{Fe}_2\text{As}_2$  is plotted in Supplementary Figure 3b. The magnetic fraction at the base temperature was found to be only 8 %. Bearing in mind that the signal from the magnetically ordered parts vanishes within the first  $0.2 \mu\text{s}$  in the whole temperature region, the analysis of transverse field data was restricted to times  $t > 0.2 \mu\text{s}$ .

Supplementary Figure 4 shows the ZF- $\mu$ SR time spectra for  $\text{Ba}_{0.65}\text{Rb}_{0.35}\text{Fe}_2\text{As}_2$  at various applied pressures. The ZF relaxation rate stays nearly unchanged between  $p = 0$  GPa and 2.25 GPa, implying that there is no sign of pressure induced magnetism in this system.

### III. SUPPLEMENTARY NOTE 3: MICROSCOPIC MODEL FOR ANALYZING THE PENETRATION DEPTH DATA OF $\text{Ba}_{0.65}\text{Rb}_{0.35}\text{Fe}_2\text{As}_2$

#### Model for $s^{+-}$ pairing:

As a minimal model that accounts for the different superconducting states of the iron

pnictides (nodeless  $s^{+-}$ , nodal  $s^{+-}$ , and  $d$ -wave), we consider a two-dimensional system with three isotropic Fermi pockets [9]: one hole pocket  $h$  centered around  $\Gamma = (0, 0)$  and two electron pockets  $e_1$  and  $e_2$  centered around  $M_1 = (\pi, 0)$  and  $M_2 = (0, \pi)$  (see Supplementary Figure 5). To describe the  $s^{+-}$  state, the pairing interaction between the hole pocket  $h$  and the electron pocket  $e_1$  is assumed to be angular dependent with the form:

$$V_{he_1} = V_0(r - \cos 2\phi)h_{\uparrow}^{\dagger}(\mathbf{k})h_{\downarrow}^{\dagger}(-\mathbf{k})e_{1\downarrow}(-\mathbf{p})e_{1\uparrow}(\mathbf{p}) + h.c. , \quad (2)$$

where  $\phi$  is the polar angle measured relative to the center of the electron pocket,  $V_0$  is the interaction energy scale, and  $r$  is the relative amplitude of the angular-independent and the angular-dependent pairing interactions. Due to the tetragonal symmetry of the system, the pairing interaction between  $h$  and  $e_2$  is:

$$V_{he_2} = V_0(r + \cos 2\phi)h_{\uparrow}^{\dagger}(\mathbf{k})h_{\downarrow}^{\dagger}(-\mathbf{k})e_{2\downarrow}(-\mathbf{p})e_{2\uparrow}(\mathbf{p}) + h.c. . \quad (3)$$

Furthermore, to minimize the number of free parameters, we assume that the three pockets have the same Fermi velocity  $v_f$ , while the density of states can in principle be different  $\rho_h/\rho_e = \eta$ . Within this model, we obtain an  $s^{+-}$  state, where the SC gap of the hole pocket is a constant,  $\Delta_h$ , and the gap on the electron pockets is of the form  $\Delta_{e_1} = \Delta_e(r - \cos 2\phi)$  and  $\Delta_{e_2} = \Delta_e(r + \cos 2\phi)$ . Accidental nodes appear in the electron pockets if  $r < 1$ . Introducing the energy cutoff  $\Lambda_c$ , we can write down the corresponding BCS-like gap equations:

$$\begin{aligned} \Delta_h &= -\rho_e V_0 \Delta_e \int_{-\Lambda_c}^{\Lambda_c} d\epsilon \int \frac{d\phi}{2\pi} \left( \frac{(r + \cos 2\phi)^2}{2E_{e_1}(\mathbf{k})} \tanh \frac{\beta E_{e_1}(\mathbf{k})}{2} + \frac{(r - \cos 2\phi)^2}{2E_{e_2}(\mathbf{k})} \tanh \frac{\beta E_{e_2}(\mathbf{k})}{2} \right) \\ \Delta_e &= -\rho_h V_0 \Delta_h \int_{-\Lambda_c}^{\Lambda_c} \frac{d\epsilon}{2E_h(\mathbf{k})} \tanh \frac{\beta E_h(\mathbf{k})}{2} \end{aligned} \quad (4)$$

where  $E_{e_1}(\mathbf{k})$ ,  $E_{e_2}(\mathbf{k})$ , and  $E_h(\mathbf{k})$  are the quasi-particle energy dispersions:

$$E_{e_1}(\mathbf{k}) = \sqrt{\epsilon_e^2 + \Delta_e^2(r - \cos 2\phi)^2}, \quad E_{e_2}(\mathbf{k}) = \sqrt{\epsilon_e^2 + \Delta_e^2(r + \cos 2\phi)^2}, \quad E_h(\mathbf{k}) = \sqrt{\epsilon_h^2 + \Delta_h^2}.$$

To determine  $T_c$ , we linearize the gap equations, yielding:

$$\begin{cases} \Delta_h = -\Delta_e \rho_e V_0 (2r^2 + 1) \int_0^{\Lambda_c} \frac{d\epsilon}{\epsilon} \tanh \frac{\beta_c \epsilon}{2} \\ \Delta_e = -\Delta_h \eta \rho_e V_0 \int_0^{\Lambda_c} \frac{d\epsilon}{\epsilon} \tanh \frac{\beta_c \epsilon}{2} \end{cases} \implies \rho_e V_0 = \left[ \sqrt{\eta(2r^2 + 1)} \int_0^{\Lambda_c} \frac{d\epsilon}{\epsilon} \tanh \frac{\beta_c \epsilon}{2} \right]^{-1}$$



To perform the fitting, we set  $T_c$  to be fixed, and set the energy cutoff  $\Lambda_c = 86\text{meV}$  (the results do not depend significantly on the choice of the cutoff). This provides a constraint on  $\rho_e V_0$ ,  $\eta$ , and  $r$ . When  $T < T_c$ , the gaps are calculated based on the BCS Eqs. (4) and (5).

The expression for the penetration depth of a single-band system is:

$$\lambda_{\mu\mu}^{-2}(T) = \frac{4\pi}{cV} \sum_{\mathbf{k}} \left[ \left\langle \frac{\partial^2 \epsilon}{\partial k_\mu^2} \right\rangle + \left( \frac{\partial \epsilon}{\partial k_\mu} \right)^2 \frac{\partial f}{\partial E_{\mathbf{k}}} \right] \rightarrow \frac{1}{V} \sum_{\mathbf{k}} \left( \frac{\partial \epsilon}{\partial k_\mu} \right)^2 \left[ \frac{\partial f}{\partial E_{\mathbf{k}}} - \frac{\partial f}{\partial \epsilon_{\mathbf{k}}} \right],$$

where  $f$  is the Fermi distribution function,  $\epsilon$  is the energy of the non-interacting system, and  $E_{\mathbf{k}}$  is the quasi-particle energy dispersion. Applying this formula to our three pocket model, we obtain

$$\begin{aligned} \lambda^{-2}(T) &\propto \rho_h \frac{v_f^2}{2} \int_{-\Lambda_c}^{\Lambda_c} d\epsilon \left( \frac{\partial f}{\partial E_h} - \frac{\partial f}{\partial \epsilon_h} \right) + \rho_e v_f^2 \int_{-\Lambda_c}^{\Lambda_c} d\epsilon \int \frac{d\phi}{2\pi} \cos^2 \phi \left( \frac{\partial f}{\partial E_{e_1}} - \frac{\partial f}{\partial \epsilon_e} \right) \\ &\quad + \rho_e v_f^2 \int_{-\Lambda_c}^{\Lambda_c} d\epsilon \int \frac{d\phi}{2\pi} \cos^2 \phi \left( \frac{\partial f}{\partial E_{e_2}} - \frac{\partial f}{\partial \epsilon_e} \right) \\ \lambda^{-2}(T) &\propto \rho_e v_f^2 \left[ \frac{2+\eta}{2} (1 - 2f(\Lambda_c)) + \eta \int_0^{\Lambda_c} d\epsilon \frac{\partial f}{\partial E_h} + 2 \int_0^{\Lambda_c} d\epsilon \int \frac{d\phi}{2\pi} \frac{\partial f}{\partial E_e} \right] \end{aligned} \quad (6)$$

In the fittings, we will focus on the normalized penetration depth  $\lambda^{-2}(T)/\lambda^{-2}(0)$ .

### Model for $d$ -wave pairing:

To describe the  $d$ -wave superconducting state within our three band model, we consider the following form of the pairing interaction:

$$\begin{aligned} V_{\text{he}_1} &= V_0(r - \cos 2\theta) h_{\uparrow}^{\dagger}(\mathbf{k}) h_{\downarrow}^{\dagger}(-\mathbf{k}) e_{1\downarrow}(-\mathbf{p}) e_{1\uparrow}(\mathbf{p}) + h.c. \\ V_{\text{he}_2} &= V_0(r + \cos 2\theta) h_{\uparrow}^{\dagger}(\mathbf{k}) h_{\downarrow}^{\dagger}(-\mathbf{k}) e_{2\downarrow}(-\mathbf{p}) e_{2\uparrow}(\mathbf{p}) + h.c. \end{aligned}$$

where  $\theta$  is the angle around the hole pocket. The gap functions can then be written as:

$$\Delta_{e_1} = -\Delta_{e_2} = \Delta_e, \quad \Delta_h(\mathbf{k}) = \Delta_h \cos 2\theta.$$

resulting in the BCS-like gap equations:

$$\begin{aligned} \Delta_h &= 2\Delta_e \rho_e V_0 \int_{-\Lambda_c}^{\Lambda_c} \frac{d\epsilon}{2E_e} \tanh \frac{\beta E_e}{2} \\ \Delta_e &= \Delta_h \eta \rho_e V_0 \int_{-\Lambda_c}^{\Lambda_c} d\epsilon \int \frac{d\theta}{2\pi} \frac{\cos^2 2\theta}{2E_h} \tanh \frac{\beta E_h}{2} \end{aligned}$$

Here,  $\eta = \rho_h/\rho_e$ ,  $E_e = \sqrt{\epsilon_e^2 + \Delta_e^2}$ , and  $E_h = \sqrt{\epsilon^2 + \Delta_h^2 \cos^2 2\theta}$ . Repeating the same steps as for the  $s^{+-}$  case, we obtain the penetration depth:

$$\lambda^{-2}(T) \propto \rho_e v_f^2 \left[ \frac{2 + \eta}{2} (1 - 2f(\Lambda_c)) + \eta \int_0^{\Lambda_c} d\epsilon \int \frac{d\theta}{2\pi} \frac{\partial f}{\partial E_h} + 2 \int_0^{\Lambda_c} d\epsilon \frac{\partial f}{\partial E_e} \right] \quad (7)$$

Comparing the expressions for the  $d$ -wave case to the expressions we derived for the  $s^{+-}$  case, Eqs. (4) and (6), we note that they can be mapped onto each other if  $r = 0$ . In this extreme case, changing  $\eta_d \rightarrow 4/\eta_s$ ,  $V_{0,d} \rightarrow \eta V_{0,s}/2$ , and  $\Delta_h \leftrightarrow \Delta_e$  leads to the same gap equations and penetration depth expression. With these replacements, both  $s$  and  $d$  pairing give the same  $\lambda^{-2}(T)/\lambda^{-2}(0)$ . Therefore, we conclude that the penetration depth cannot distinguish between nodal- $s^{+-}$  and  $d$ -wave if the nodal- $s^{+-}$  is the extreme case with  $r = 0$ .

### Fitting Results:

We now fit the experimental data  $\lambda^{-2}(T)/\lambda^{-2}(0)$  of optimally-doped  $\text{Ba}_{1-x}\text{Rb}_x\text{Fe}_2\text{As}_2$  to find the values of  $\rho_e V_0$ ,  $\eta$ , and  $r$  for different pressures. Note that the value of  $T_c$  imposes another constraint on these three parameters, as explained above. Supplementary Figures 6a, b and c show the fitting for the  $s^{+-}$  model for  $P = 0$ ,  $P = 1.57$  GPa, and  $P = 2.25$  GPa, respectively. For the  $P = 0$  case, we find equal gap amplitudes and no nodes, as seen by ARPES experiments in the related compound  $\text{Ba}_{1-x}\text{K}_x\text{Fe}_2\text{As}_2$ . We see that the fitting is not as good in the region immediately below  $T_c$ . We will discuss this issue in more details below. For the pressurized samples, the fitting is overall better and indicates a nodal state ( $r < 1$ ). The value of the density of states ratio  $\rho_h/\rho_e$  is little affected by pressure (as expected, since no charge carriers are introduced), and is consistent with the value of a nearly compensated metal.

Surprisingly, the best fittings for both the  $P = 1.57$  GPa and  $P = 2.25$  GPa cases give  $r = 0$ , where the nodes on the electron pockets are fixed at  $\theta = \pm\pi/4$ . This is a very special case of the accidentally nodal  $s^{+-}$  state, since by symmetry there is no reason for  $r$  to vanish. To make this point more transparent, in Supplementary Figure 7a we plot the non-zero pressure data and the theoretical curves for the penetration depth for various values of  $r$  – keeping all the other parameters constant. Clearly,  $0 < r < 1$  gives worst fittings than  $r = 0$ . What we also found is that  $r = 10$  – i.e. a nodeless superconducting state – describes the data better near  $T_c$ , on the expense of a very bad fitting at low temperatures – where the nodal behavior is evident.

As we discussed in the previous section, a nodal- $s^{+-}$  state with  $r = 0$  is indistinguishable – for fitting purposes – from a  $d$ -wave state. Since there is no symmetry reason to have  $r = 0$  in our simple model, or even  $r \ll 1$  over a wide pressure range, we interpret this result as an indirect indication that a  $d$ -wave state is more likely to be the state of the pressurized samples.

Finally, we comment on the difficulty of the fittings to capture the behavior near  $T_c$  – particularly for the sample at ambient pressure (see Supplementary Figure 6a). One reason could be the presence of inhomogeneities, which would require a distribution of gaps to be taken into account, instead of a single gap value. Another reason could be related to our choice of fixing the Fermi velocities to be the same for both the electron and hole pockets. To investigate this possibility, we lift this restriction and allow  $v_h/v_e$  to also be a fitting parameter. The result is shown in Supplementary Figure 7b. Clearly, we obtain a better fitting, but not only  $\rho_e V_0$  is relatively large, but the ratios  $\rho_h/\rho_e$  and  $v_h/v_e$  are very large or very small, which is difficult to reconcile with the Fermi surface of these materials. Most likely, additional pockets are necessary to capture the full temperature dependence of the penetration depth. Nevertheless, our microscopic model provides results that agree with those obtained from the  $\alpha$ -model fitting, particularly in the low-temperature regime, suggesting that a  $d$ -wave state is more likely to be realized than a nodal  $s^{+-}$  state.

---

#### IV. SUPPLEMENTARY REFERENCES

- [1] Bud'ko, S.L., Ni, Ni., and Canfield, Paul C. Jump in specific heat at the superconducting transition temperature in  $\text{Ba}(\text{Fe}_{1-x}\text{Co}_x)_2\text{As}_2$  and  $\text{Ba}(\text{Fe}_{1-x}\text{Ni}_x)_2\text{As}_2$ . *Phys. Rev. B* **79**, 220516(R) (2009).
- [2] Huang, Q. *et al.* Neutron-Diffraction Measurements of Magnetic Order and a Structural Transition in the Parent  $\text{BaFe}_2\text{As}_2$  Compound of FeAs-Based High-Temperature Superconductors. *Phys. Rev. Lett.* **101**, 257003 (2008).
- [3] Torikachvili, M.S., Bud'ko, S.L., Ni, N., and Canfield, P.C. Pressure Induced Superconductivity in  $\text{CaFe}_2\text{As}_2$ . *Phys. Rev. Lett.* **101**, 057006 (2008).
- [4] Miclea, C.F. *et al.* Evidence for a reentrant superconducting state in  $\text{EuFe}_2\text{As}_2$  under pressure *Phys. Rev. B* **79**, 212509 (2009).

- [5] Zhao, J. *et al.* Structural and magnetic phase diagram of  $\text{CeFeAsO}_{1-x}\text{F}_x$  and its relation to high-temperature superconductivity. *Nature Materials* **7**, 953-959 (2008).
- [6] Khasanov, R. *et al.* Two-Gap Superconductivity in  $\text{Ba}_{1-x}\text{K}_x\text{Fe}_2\text{As}_2$ : A Complementary Study of the Magnetic Penetration Depth by Muon-Spin Rotation and Angle-Resolved Photoemission. *Phys. Rev. Lett.* **102**, 187005 (2009).
- [7] Kubo, R., and Toyabe, T. *Magnetic Resonance and Relaxation* (North Holland, Amsterdam, 1967).
- [8] Hayano, R.S., Uemura, Y.J., Imazato, J., Nishida, N., Yamazaki, T., and Kubo, R. Zero-and low-field spin relaxation studied by positive muons. *Phys. Rev. B* **20**, 851-859 (1979).
- [9] Kang, J., Kemper, A.F., and Fernandes, R. M. Manipulation of Gap Nodes by Uniaxial Strain in Iron-Based Superconductors. *Phys. Rev. Lett.* **113**, 217001 (2014).
